# Supplementary material
Source: publisher figshare collection journal article supplement (https://karger.figshare.com/articles/dataset/_/5120695)
Supplement: Supplementary file 1 [file 1]

## Supplementary Material

### *S1. Independent confirmations of the linkage arrangements*

Sequential assignment of the central GlcA and GlcNAc rings within K5 oligosaccharides was achieved using the progressive chemical shift changes across the series from K5<sub>2</sub> to K5<sub>6</sub> as well as clear nuclear Overhauser enhancements (NOEs) across the glycosidic linkages (e.g., in the NOESY spectrum of K5<sub>6</sub>, three inter-residue NOEs from protons in ring III to the H-1 proton of ring IV are clearly visible; see Fig. 4). Acetamido sidechain H-Me chemical shifts were assigned using NOEs to the corresponding GlcNAc N-H protons.

<sup>13</sup>C chemical shift changes induced by transfer of K5<sub>4</sub> from 5% D<sub>2</sub>O to 100 % D<sub>2</sub>O were also measured (see Table 1). These deuterium isotope-effects, resulting from the exchange of hydroxyl hydrogen atoms for deuterium, are considerably greater at (unsaturated) <sup>13</sup>C-atoms bonded to hydroxyl oxygen atoms (-0.106 to -0.190ppm) compared with <sup>13</sup>C-atoms bonded to glycosidic linkage oxygen atoms (+0.012 to -0.050 ppm).

One-bond <sup>1</sup>J<sub>H,C</sub> and <sup>1</sup>J<sub>H,N</sub> coupling constants within K5<sub>6</sub> were directly measured from [<sup>1</sup>H, <sup>13</sup>C]-HSQC and [<sup>1</sup>H, <sup>15</sup>N]-HSQC spectra recorded with heteronuclear broadband decoupling disabled during acquisition (see Table S1). All <sup>1</sup>J<sub>H,C</sub> values are typical of saccharide rings and the <sup>1</sup>J<sub>H-1,C-1</sub> values, which are characteristic for α- and β-geometries, further corroborate the linkage arrangements [Gettins and Horne, 1992, Yates *et al.*, 2000]. The <sup>1</sup>J<sub>H,N</sub> values are typical of amide groups.

### S2 $\alpha$ : $\beta$ anomer ratio in K5 oligosaccharides

The  $\alpha$ : $\beta$  anomer ratio for K5 oligosaccharides was determined to be  $62 \pm 1$  %  $\alpha$ -anomer at pH 6.0 and 24.4°C (irrespective of oligosaccharide length) by comparison of I $\alpha$  and I $\beta$  [H-Me<sup>I</sup>,C-Me<sup>I</sup>] peak volumes in the [<sup>1</sup>H, <sup>13</sup>C]-HSQC spectra, i.e., the ratio is barely different from that of GlcNAc monosaccharide ( $60 \pm 1$  % [Blundell *et al.*, 2006]). Differences in chemical shift between  $\alpha$ - and  $\beta$ -anomer forms of K5 oligosaccharides were seen throughout the adjacent ring (i.e., ring II), but no further (as is typically the case).

### S3. Conformation of the $\Delta$ 4,5-unsaturated GlcA ring

The conformation of the  $\Delta$ 4,5-unsaturated GlcA ring in solution is expected to be a <sup>1</sup>H<sub>2</sub> or <sup>2</sup>H<sub>1</sub> half-chair form, or a mixture of these forms [Mikhailov *et al.*, 1996, Mikhailov *et al.*, 1997]. The <sup>1</sup>H<sub>2</sub> form is characterised by near-equal <sup>3</sup>J<sub>1,2</sub> and <sup>3</sup>J<sub>2,3</sub> <sup>1</sup>H coupling constants of about 4 Hz, whereas the <sup>2</sup>H<sub>1</sub> form shows <sup>3</sup>J<sub>1,2</sub> and <sup>3</sup>J<sub>2,3</sub> coupling constants greater than 6 Hz. Since the  $\Delta$ 4,5-GlcA ring in K5<sub>4</sub> (ring IV) has <sup>3</sup>J<sub>1,2</sub> and <sup>3</sup>J<sub>H2,H3</sub> coupling constants of 6.4 and 5.7 Hz (see Table 2), respectively, it is evident that the unsaturated GlcA ring predominantly adopts the <sup>2</sup>H<sub>1</sub> conformation in solution. This is in contrast to reports of the conformation of a 2-O-sulphated  $\Delta$ 4,5-GlcA ring in heparin tetra- and hexasaccharides, which were predominantly in the <sup>1</sup>H<sub>2</sub> conformations [Mikhailov *et al.*, 1996, Mikhailov *et al.*, 1997]; this difference in ring geometry is presumably due to the bulky 2-O-sulphate group being better sterically accommodated in the <sup>1</sup>H<sub>2</sub> conformation.

### S4. Amide nitrogen temperature coefficients

The amide nitrogen temperature coefficients are also reported here ( $\Delta\delta_N/\Delta T$ , Table 4), but currently these cannot be related to a simple physical model [Blundell and Almond, 2007].

Supplementary Table 1. One-bond coupling constants in K5<sub>6</sub>

| <sup>1</sup> J <sub>H,X</sub> (± 0.3 – 0.6 Hz) | GlcNAc |       |       |           |
|------------------------------------------------|--------|-------|-------|-----------|
|                                                | Iβ     | Iα    | III   | V         |
| H-1,C-1                                        | 162.9  | 171.0 | 175.3 | 175.5     |
| H-2,C-2                                        | 141.5  | 140.8 | 141.3 | 137.7     |
| H-3,C-3                                        | 146.2  | 147.6 | 148.0 | 146.7     |
| H-4,C-4                                        | 151.0  | 145.8 | 145.5 | 147.6     |
| H-5,C-5                                        | 146.3  | 145.8 | 145.3 | 147.6     |
| H-6 <i>proR</i> ,C-6                           | 142.2  | 145.2 | 145.4 | 144.0     |
| H-6 <i>proS</i> ,C-6                           | 144.0  | 143.1 | 142.6 | 144.0     |
| H-Me,C-Me                                      | 128.7  | 128.7 | 128.7 | 128.7     |
| H-N,N                                          | -91.9  | -93.0 | -92.9 | -93.1     |
|                                                | GlcA   |       |       | Δ4,5-GlcA |
|                                                | IIβ    | IIα   | IV    | VI        |
| H-1,C-1                                        | 162.9  | 162.9 | 163.1 | 168.6     |
| H-2,C-2                                        | 145.3  | 145.8 | 145.3 | 148.2     |
| H-3,C-3                                        | 144.4  | 144.4 | 144.8 | 146.9     |
| H-4,C-4                                        | 148.7  | 148.7 | 148.4 | 167.6     |
| H-5,C-5                                        | 148.7  | 148.7 | 148.7 | n/a       |

## References

- Blundell, C.D., Reed, M.A.C., Almond, A.: Complete assignment of hyaluronan oligosaccharides up to hexasaccharides. *Carbohydr. Res.* 2006; 341: 2803-2815.
- Blundell, CD, Almond, A: Temperature dependencies of amide  $^1\text{H}$ - and  $^{15}\text{N}$ -chemical shifts in hyaluronan oligosaccharides. *Magn. Reson. Chem.* 2007; 45: 430-433.
- Gettins, P, Horne, AP: One- and two-dimensional  $^{13}\text{C}$  NMR characterization of two series of oligosaccharides derived from porcine intestinal mucosal heparin by degradation with heparinase. *Carbohydr. Res.* 1992; 223: 81-98.
- Mikhailov, D., Mayo, K.H., Vlahov, I.R., Toida, T., Pervin, A., Linhardt, R.J.: NMR solution conformation of heparin-derived tetrasaccharide. *Biochem. J.* 1996; 318: 93-102.
- Mikhailov, D., Linhardt, R.J., Mayo, K.H. NMR solution conformation of heparin-derived hexasaccharide: *Biochem. J.* 1997; 328: 51-61.
- Yates, EA, Santini, F, De Cristofano, B, Payre, N, Cosentino, C, Guerrini, M, Naggi, A, Torri, G, Hricovini, M: Effect of substitution pattern on  $^1\text{H}$ ,  $^{13}\text{C}$  NMR chemical shifts and  $^1\text{JCH}$  coupling constants in heparin derivatives. *Carbohydr. Res.* 2000; 329: 239-247.

Supplementary Figure

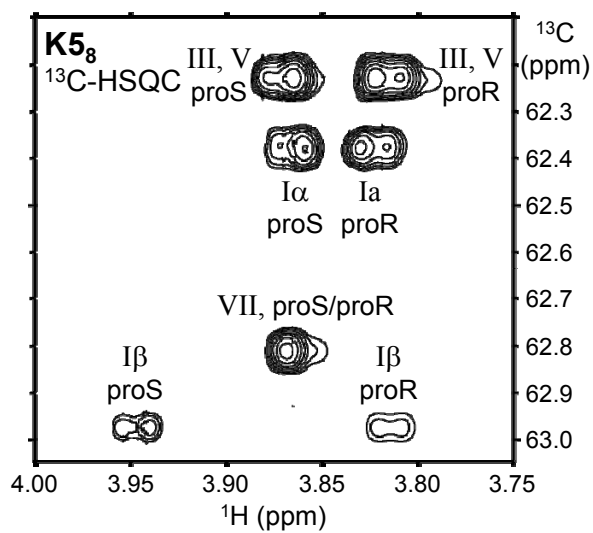

Supplementary Figure. Partial [<sup>1</sup>H,<sup>13</sup>C]-HSQC spectrum (900 MHz) of K5<sub>8</sub>, showing the C-6 hydroxymethyl region for comparison with that of K5<sub>6</sub> in Figure 3A. Resonances from rings III and V are not resolved in K5<sub>8</sub>, indicating that these central rings are approaching the polymer environment.
